# Supplementary material
Source: MDPI journal article supplement (https://www.mdpi.com/2227-9717/10/11/2438)
Supplement: s1 [file s1]

*Supplementary Materials*

# The Effect of Water, Nanoparticulate Silica and Dry Water on the Flow Properties of Cohesionless Sand

Leigh Duncan Hamilton <sup>1,\*</sup>, Harald Zetzener <sup>1</sup> and Arno Kwade <sup>1</sup>

<sup>1</sup> Institute for Particle Technology, Technische Universität Braunschweig, Volkmaroder Straße 5, 38104 Braunschweig, Germany

\* Correspondence: Leigh-Duncan.Hamilton@tu-braunschweig.de

## Equipment Used for Preparation and Characterisation

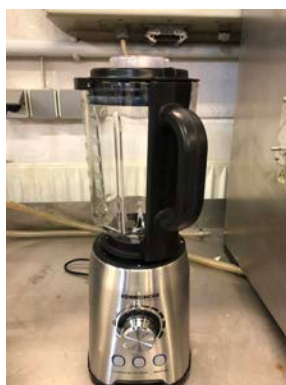

**Figure S1.** MX 1250, Rommelsbacher: A high shear blender equipped with a rotor and six blades used to produce dry water. The Maximum speed is  $22,000 \text{ min}^{-1}$  and the blade diameter is approximately 0.07 m.

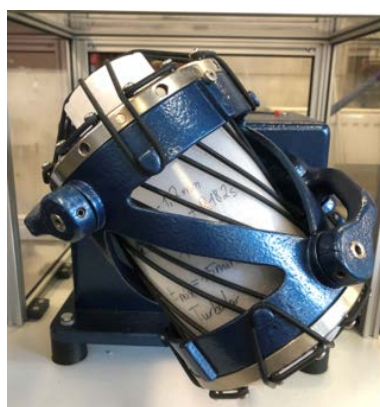

**Figure S2.** Turbula mixer, Willy A. Bachofen AG: A 3D shaker mixer applied to create mixtures of coarse sand and dry water. The frequency during mixing was  $49 \text{ min}^{-1}$  and the container filling degree was 70 %.

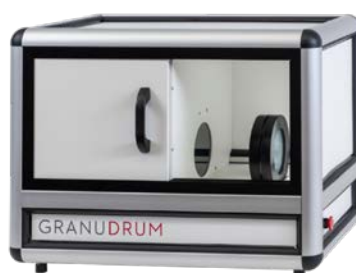

**Figure S3.** GranuDrum by GranuTools: A device to measure the dynamic angle of repose based on the rotating drum method. The black cylinder was filled to 50 % by volume and speeds were varied between  $2 \text{ min}^{-1}$  and  $50 \text{ min}^{-1}$ . Note, the glass screens were replaced with Perspex discs to avoid problems during measurements (water spreading on the screen). Image source: <https://www.granutools.com/en/granudrum>

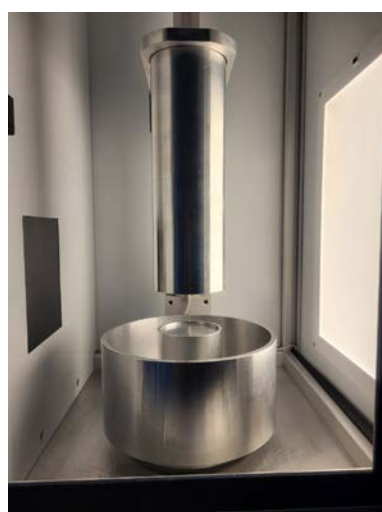

**Figure S4.** Device constructed at the Institute for Particle Technology, TU Braunschweig: A device to measure the static angle of repose based on the hollow cylinder method. The cylinder was filled with 150 ml sample before it was elevated at  $150 \text{ mm/min}$ . Cylinder length and diameter were 60 mm and 120 mm, respectively.

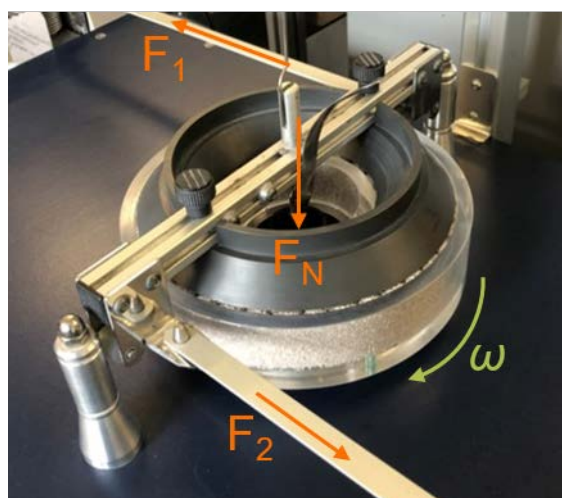

**Figure S5.** Ring shear tester, RST-01, by Dietmar Schulze GmbH: A device used to measure bulk behaviour in a quasi-static environment under normal stress. The normal stress ranged from 125 Pa to 16 kPa. The shear cell has a volume of approximately 950 ml and the shear velocity was  $1.0 \text{ mm/s}$ .  $F_N$  is the normal force,  $F_1$  and  $F_2$  are forces resulting from the pull rods, and  $\omega$  is the angular velocity.

## Nomenclature

Table S 1. List of Symbols

| Symbol                             | Description [Unit]                                                |
|------------------------------------|-------------------------------------------------------------------|
| AM                                 | Additive manufacturing                                            |
| AoR                                | Angle of Repose                                                   |
| CI                                 | Cohesive index [-]                                                |
| DW                                 | Dry water                                                         |
| DW <sub>H<sub>2</sub>O:R812S</sub> | Dry water with ratio of water (H <sub>2</sub> O) to Aerosil R812S |
| EDX                                | Energy-dispersive X-ray spectroscopy                              |
| H <sub>2</sub> O                   | Water                                                             |
| m <sub>i</sub>                     | Mass of substance i [kg]                                          |
| μCT                                | Micro-computed tomography                                         |
| n                                  | Frequency / Rotational speed [min <sup>-1</sup> ]                 |
| n <sub>DRUM</sub>                  | Drum rotational speed [min <sup>-1</sup> ]                        |
| R812S                              | Aerosil R812S                                                     |
| SAC                                | Surface are coverage                                              |
| SEM                                | Scanning electron microscope                                      |
| SiO <sub>2</sub>                   | Silicon dioxide, quartz                                           |
| SPI                                | Selective Paste Intrusion                                         |
| t <sub>mix</sub>                   | Mixing time [min]                                                 |
| V <sub>i</sub>                     | Volume of substance i [m <sup>3</sup> ]                           |
| WAAM                               | Wire Arc Additive Manufacturing                                   |
| w <sub>i</sub>                     | Weight percentage of substance i [%]                              |
| W <sub>s,m</sub>                   | Measured solids content                                           |
| α <sub>d,r</sub>                   | Dynamic angle of repose [°]                                       |
| α <sub>s,r</sub>                   | Static angle of repose [°]                                        |
| Q <sub>B</sub>                     | Bulk density [kg/m <sup>3</sup> ]                                 |
| σ                                  | Normal stress [Pa]                                                |
| σ <sub>pre</sub>                   | Pre-consolidation stress [Pa]                                     |
| τ <sub>sf</sub>                    | Shear stress at steady-state flow [Pa]                            |
| φ                                  | Filling degree [%]                                                |
| φ <sub>sf</sub>                    | Angle of internal friction at steady-state flow [°]               |

### Supplementary Information to Energy-Dispersive X-Ray Spectroscopy (EDX)

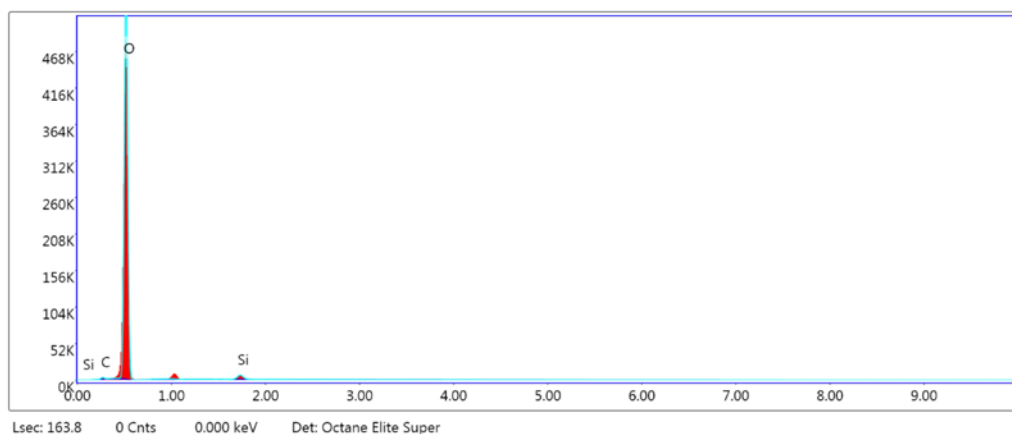

**Figure S6.** Sum Spectrum EDX: Analysis of dry water.

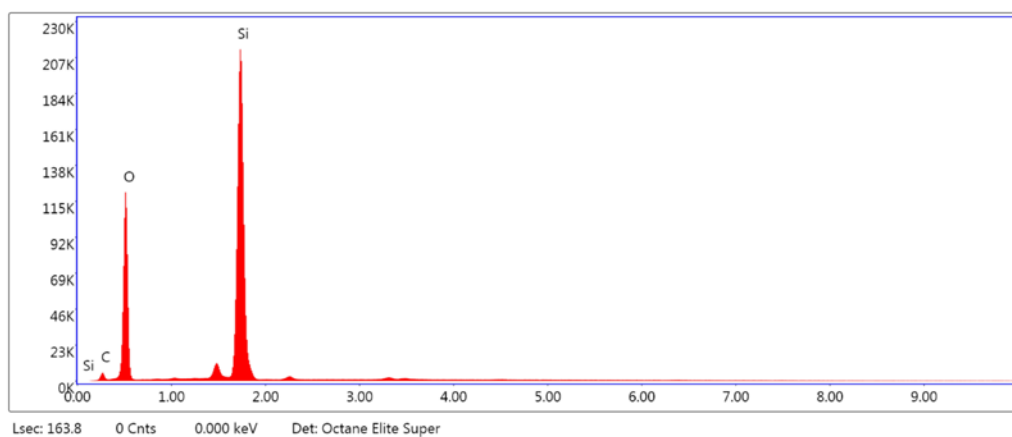

**Figure S7.** Sum Spectrum EDX: Analysis of coarse sand particle surface after mixing with dry water.
